# Supplementary material for: Non-vitamin K antagonist oral anticoagulation usage according to age among patients with atrial fibrillation: Temporal trends 2011–2015 in Denmark
Source: PubMed Central journal article supplement (PMC4980590; doi:10.1038/srep31477), 2016-08-11
Supplement: srep31477-s1.pdf [file srep31477-s1.pdf]

Original Research

**Non-vitamin K antagonist oral anticoagulation usage according to age among patients with atrial fibrillation: Temporal trends 2011-2015 in Denmark**

Laila Staerk\*, MD (1), Emil Loldrup Fosbøl, MD, PhD (2,3), Kasper Gadsbøll, MB (1), Caroline Sindet-Pedersen, M.Sc.Pharmacy (1), Jannik Langtved Pallisgaard, MD (1,6), Morten Lamberts, MD, PhD (1), Gregory Y H Lip, MD, professor (4), Christian Torp-Pedersen, MD, DMSc, professor (5), Gunnar Hilmar Gislason, MD, PhD, professor (1,3,5,6), Jonas Bjerring Olesen, MD, PhD (1).

**Supplementary Information**

## Population

|                                  |                                                                                                                                                               |                                                                                                                                                                                                                                                        |
|----------------------------------|---------------------------------------------------------------------------------------------------------------------------------------------------------------|--------------------------------------------------------------------------------------------------------------------------------------------------------------------------------------------------------------------------------------------------------|
| Non-valvular atrial fibrillation | <i>Defined from diagnosis of atrial fibrillation with the absence of diagnosis codes of valvular atrial fibrillation and mitral- or aortic valve surgery.</i> | Presence of:<br>ICD8: 42793, 42794.<br>ICD10: I48.<br>Absence of:<br>ICD8: 4240, 4241, 39500- 39502, 39508, 39509, 39600-39604, 39608, 39609.<br>ICD10: I05, I06, I080A, I081A, I082A, I083A, Z952, Z954.<br>NCSP: KFKD, KFKH, KFMD, KFMH, KFGE, KFJF. |
| Vitamin K antagonist             | <i>Defined from ATC-code.</i>                                                                                                                                 | ATC: B01AA03, B01AA04.                                                                                                                                                                                                                                 |
| Dabigatran                       | <i>Defined from ATC-code.</i>                                                                                                                                 | ATC: B01AE07.                                                                                                                                                                                                                                          |
| Rivaroxaban                      | <i>Defined from ATC-code.</i>                                                                                                                                 | ATC: B01AF01.                                                                                                                                                                                                                                          |
| Apixaban                         | <i>Defined from ATC-code.</i>                                                                                                                                 | ATC: B01AF02.                                                                                                                                                                                                                                          |
| Hip or knee replacement surgery  | <i>Defined from surgical procedure performed.</i>                                                                                                             | NCSP: KNFB, KNFC, KNGB, KNGC.                                                                                                                                                                                                                          |
| Deep venous thrombosis           | <i>Defined from diagnosis.</i>                                                                                                                                | ICD10: I801-I803, I808, I809, I821-I823, I828, I829                                                                                                                                                                                                    |
| Pulmonary embolism               | <i>Defined from diagnosis.</i>                                                                                                                                | ICD10: I26.                                                                                                                                                                                                                                            |

## Comorbidities

|                        |                                                                                 |                                   |
|------------------------|---------------------------------------------------------------------------------|-----------------------------------|
| Stroke/thromboembolism | <i>Defined from diagnosis of ischemic stroke, transient ischemic attack, or</i> | ICD10: I63, I64, I74, G458, G459. |
|------------------------|---------------------------------------------------------------------------------|-----------------------------------|

*peripheral artery embolism.*

|                           |                                                                                                                                                                                                                                                                |                                                                                                                                                                                                                                          |
|---------------------------|----------------------------------------------------------------------------------------------------------------------------------------------------------------------------------------------------------------------------------------------------------------|------------------------------------------------------------------------------------------------------------------------------------------------------------------------------------------------------------------------------------------|
| Myocardial infarction     | <i>Defined from diagnosis.</i>                                                                                                                                                                                                                                 | ICD10: I21, I22.                                                                                                                                                                                                                         |
| Ischemic heart disease    | <i>Defined from diagnosis.</i>                                                                                                                                                                                                                                 | ICD10: I20-I25.                                                                                                                                                                                                                          |
| Peripheral artery disease |                                                                                                                                                                                                                                                                | ICD10: I70                                                                                                                                                                                                                               |
| Heart failure             | <i>Defined from diagnosis.</i>                                                                                                                                                                                                                                 | ICD10: I42, I50, I110, J81.                                                                                                                                                                                                              |
| Diabetes mellitus         | <i>Defined from glucose-lowering medication.</i>                                                                                                                                                                                                               | ATC: A10.                                                                                                                                                                                                                                |
| Hypertension              | <i>Defined from combination treatment with at least two classes of antihypertensive drugs: adrenergic <math>\alpha</math>-antagonists, non-loop diuretics, vasodilators, beta-blockers, calcium channel blockers and renin-angiotension system inhibitors.</i> | ATC: C02A, C02B, C02C, C02L, C03A, C03B, C03D, C03E, C03X, C07B, C07C, C07D, C08G, C02DA, C09BA, C09DA, C02DB, C02DD, C02DG, C07A, C07B, C07C, C07D, C07F, C08, C09BB, C09DB, C09AA, C09BA, C09BB, C09CA, C09DA, C09DB, C09XA02, C09XA52 |
| Chronic kidney disease    | <i>Defined from diagnosis of chronic glomerulonephritis, chronic tubulointestinal nephropathy, diabetic, and hypertensive nephropathy among others.</i>                                                                                                        | ICD10: E102, E112, E132, E142, I120, M300, M313, M319, M321B, N02-N08, N11, N12, N14, N18, N19, N26, N158, N159, N160, N162, N163, N164, N168, Q61, Q613, Q615, Q619.                                                                    |
| Abnormal liver function   | <i>Defined from diagnosis of liver chronic liver disease, cirrhosis and hepatitis.</i>                                                                                                                                                                         | ICD10: B15-B19, C22, D684C, I982, K70-K77, Q618A, Z944.                                                                                                                                                                                  |

|                                       |                                                                                                                                                              |                                                                                                                                                                                                                                                                                                           |
|---------------------------------------|--------------------------------------------------------------------------------------------------------------------------------------------------------------|-----------------------------------------------------------------------------------------------------------------------------------------------------------------------------------------------------------------------------------------------------------------------------------------------------------|
| Bleeding                              | <i>Defined from diagnosis of intracranial bleeding, major gastrointestinal bleeding, respiratory or urinary tract bleeding, and bleeding due to anaemia.</i> | ICD10: D500, D62, G951A, H052A, H313, H356, H431, H450, I312, I60-I62, I850, I864A, J942, K228F, K298A, K250, K252, K254, K256, K260, K262, K264, K266, K270, K272, K274, K276, K280, K282, K284, K286, K625, K661, K638B, K638C, K838F, K868G, K920, K921, K922, N02, R04, R31, S064, S065, S066, S368D. |
| Alcohol abuse                         | <i>Defined from alcohol-related diagnosis codes or at least one dispensed prescription of an alcohol antagonist drug used to treat chronic alcoholism.</i>   | ICD10: E244, E52, F10, G312, G621, G721, I426, K292, K70, K860, L278A, O354, T51, Z714, Z721.<br>ATC: N07BB.                                                                                                                                                                                              |
| <b>Concomitant medication</b>         |                                                                                                                                                              |                                                                                                                                                                                                                                                                                                           |
| ADP receptor antagonists              | <i>Defined from ATC-code.</i>                                                                                                                                | ATC: B01AC04, B01AC22, B01AC24                                                                                                                                                                                                                                                                            |
| Acetylsalicylic acid (aspirin)        | <i>Defined from ATC-code.</i>                                                                                                                                | ATC: B01AC06, N02BA1.                                                                                                                                                                                                                                                                                     |
| Dipyridamole                          | <i>Defined from ATC-codes.</i>                                                                                                                               | ATC: B01AA07.                                                                                                                                                                                                                                                                                             |
| Non-steroidal anti-inflammatory drugs | <i>Defined from ATC-codes.</i>                                                                                                                               | ATC: M01A, M01AX05.                                                                                                                                                                                                                                                                                       |
| Loop diuretics                        | <i>Defined from ATC-codes.</i>                                                                                                                               | ATC: C03C                                                                                                                                                                                                                                                                                                 |

|                                     |                                |                                                                 |
|-------------------------------------|--------------------------------|-----------------------------------------------------------------|
| Beta-blockers                       | <i>Defined from ATC-codes.</i> | ATC: C07A, C07B, C07C, C07D, C07F.                              |
| Calcium channel blockers            | <i>Defined from ATC-codes.</i> | ATC: C08, C09BB, C09DB                                          |
| Renin-angiotensin system inhibitors | <i>Defined from ATC-codes.</i> | ATC: C09AA, C09BA, C09BB, C09CA, C09DA, C09DB, C09XA02, C09XA52 |
| Digoxin                             | <i>Defined from ATC-codes.</i> | ATC: C01A                                                       |
